# Supplementary material
Source: PubMed Central journal article supplement (PMC3586978)

# Supplemental Figure 1

A

30 min PC

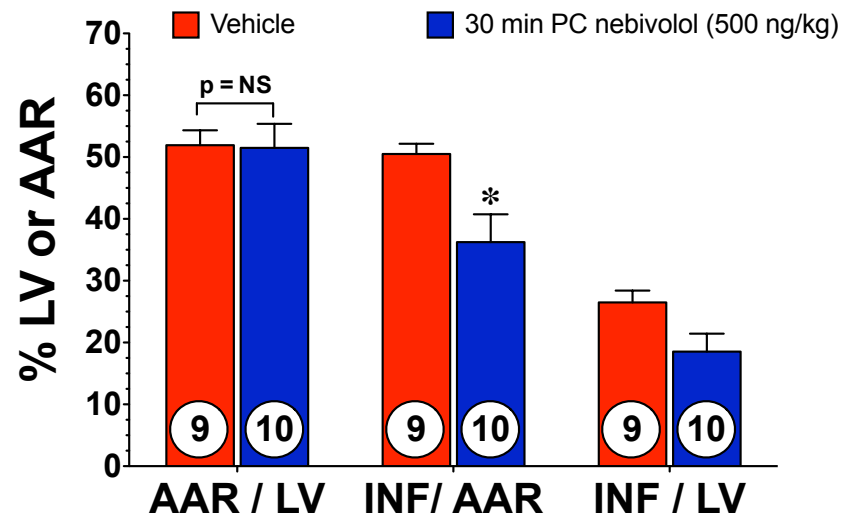

B

24 hr PC

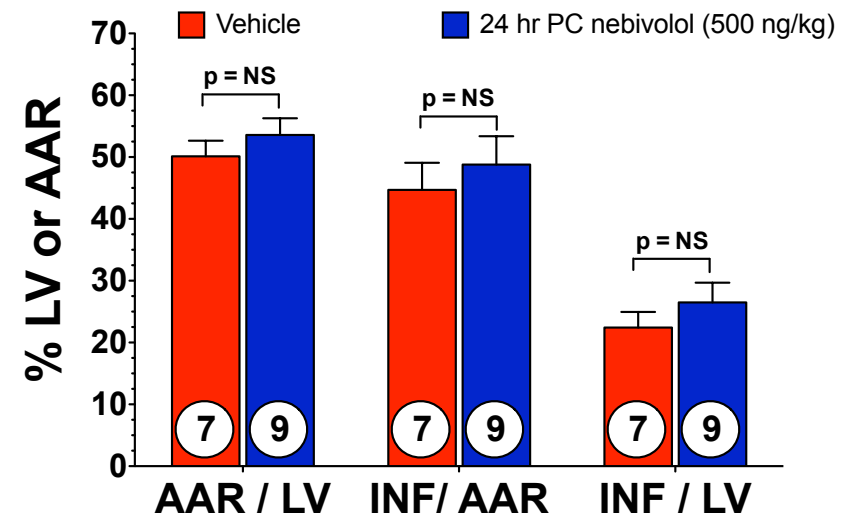

Supplemental Figure 2

A

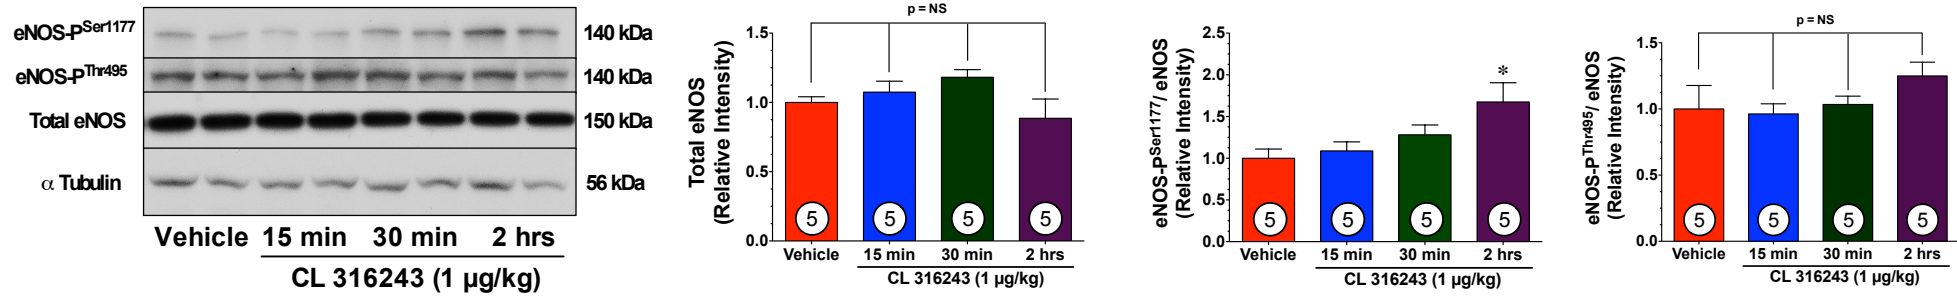

B

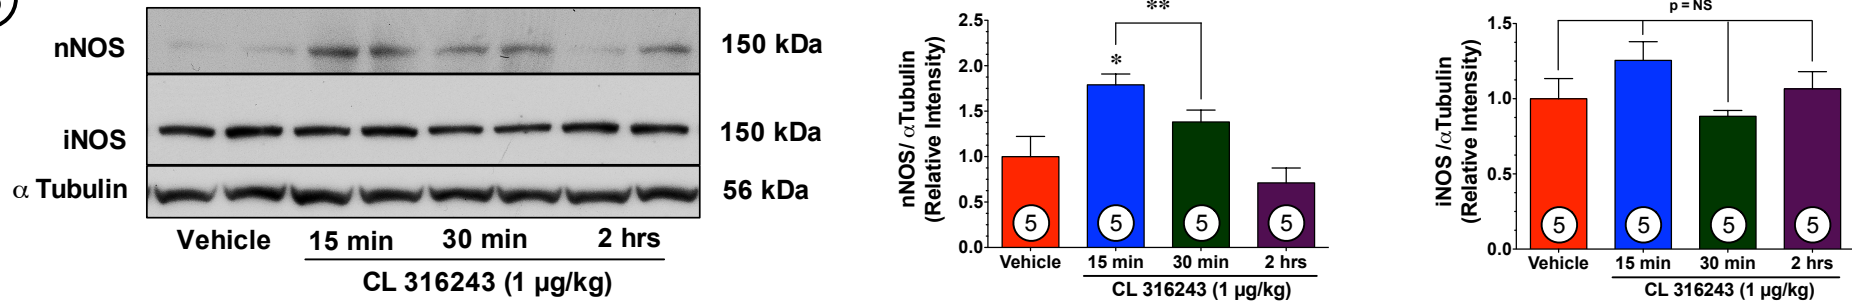

(A)

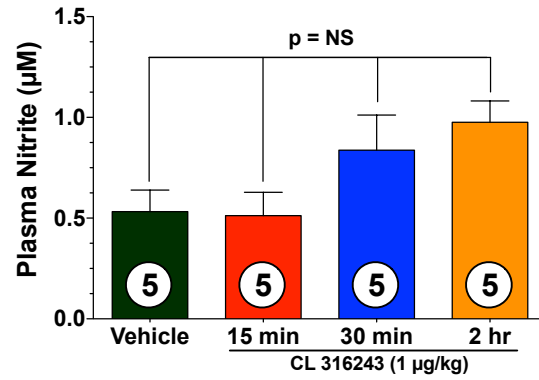

(B)

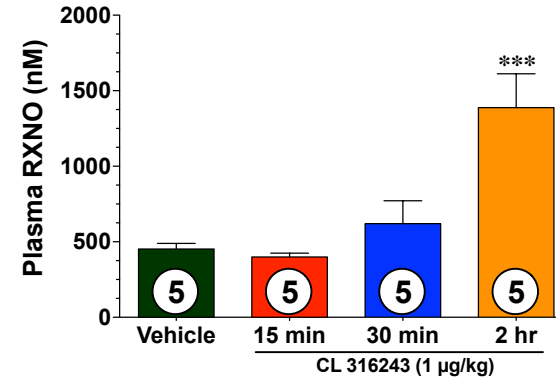

(C)

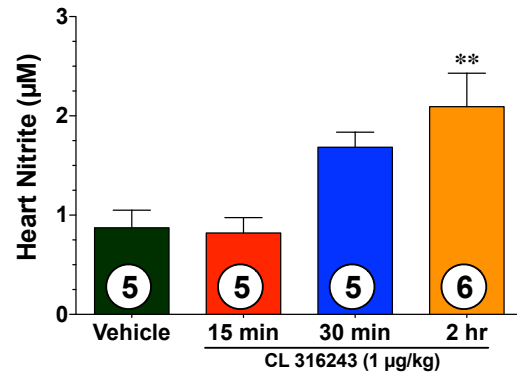

(D)

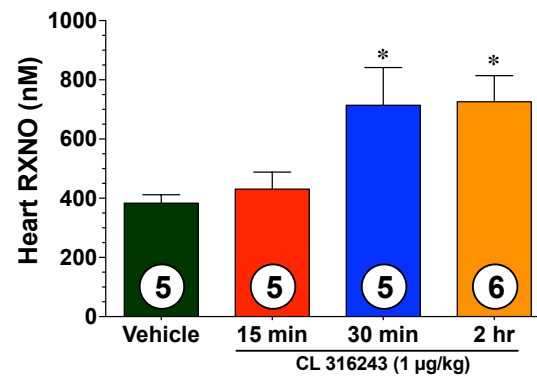

(E)

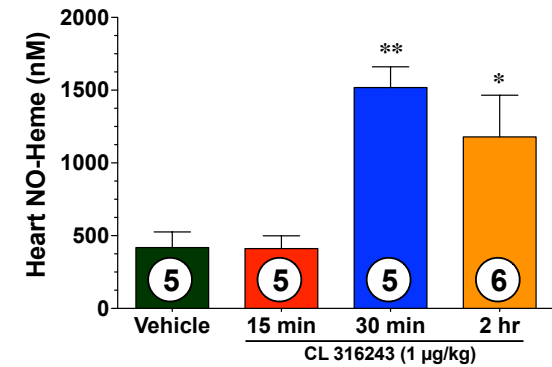

Supplement: NIHMS340629-supplement-01.pdf [file NIHMS340629-supplement-01.pdf]
